# Supplementary figures and images for: Establishment of ATP-Based Luciferase Viability Assay in 96-Well Plate for Trypanosoma congolense
Source: PubMed Central journal article supplement — J Vet Med Sci. 2014 Jul 23;76(11):1437–41. doi: 10.1292/jvms.14-0273 (PMC4272975; doi:10.1292/jvms.14-0273), 2014-07-23

# Supplementary Fig. 1

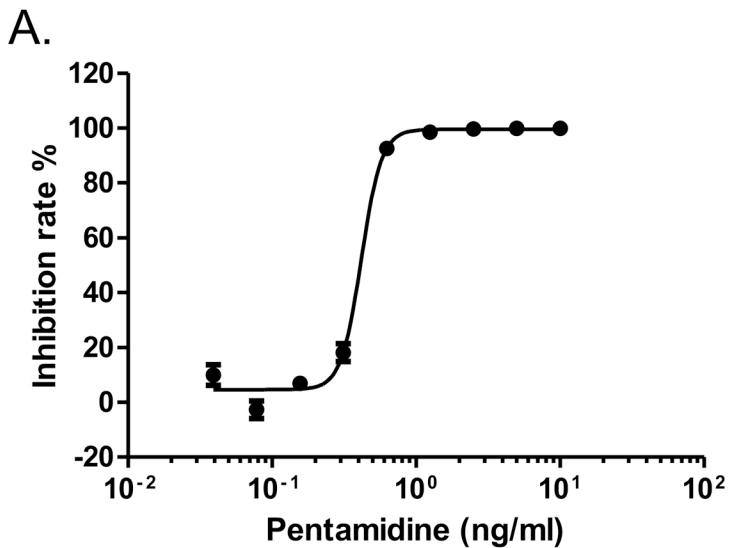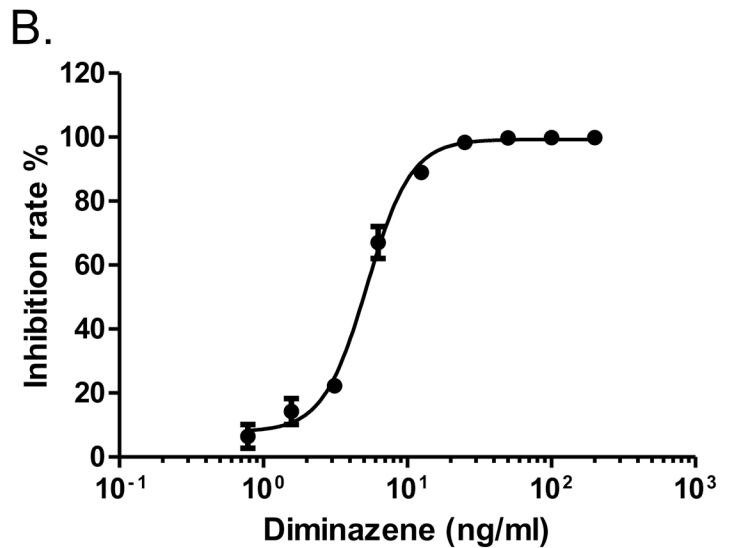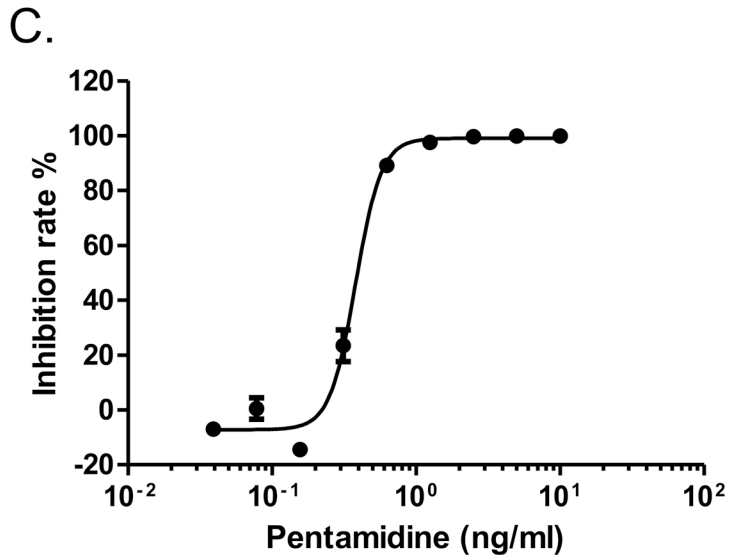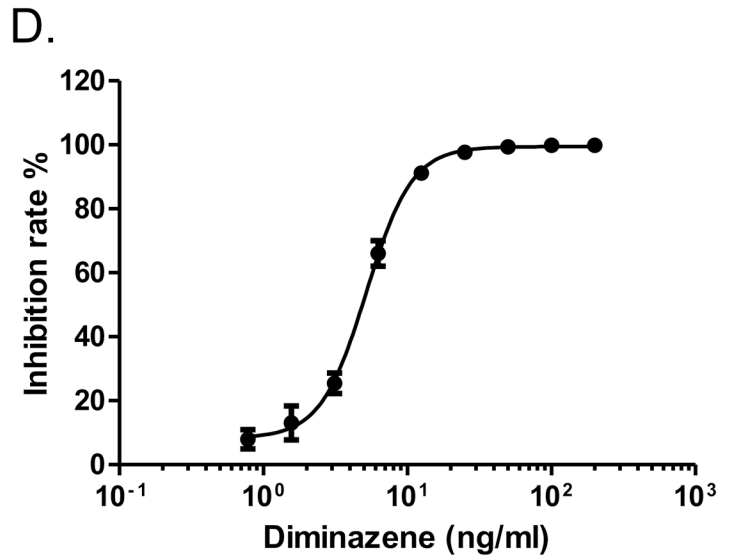

Supplement: jvms-76-1437-s001.pdf [file jvms-76-1437-s001.pdf]
